# Supplementary material for: Real‐World Clinical and Economic Outcomes in Selected Immune‐Related Adverse Events Among Patients with Cancer Receiving Immune Checkpoint Inhibitors
Source: PubMed Central journal article supplement — Oncologist. 2021 Aug 24;26(11):e2002–12. doi: 10.1002/onco.13918 (PMC8571769; doi:10.1002/onco.13918), 2021-08-24

Supplemental Figure for:  
Real-World Clinical and Economic Outcomes in Selected Immune-Related Adverse Events Among Cancer Patients Receiving Immune Checkpoint Inhibitors  
Ruth Kim et al.

**Supplemental Figure 1. Mean Length of Stay for Follow-up Hospitalizations by Type of Baseline irAE-Related Visit (inpatient vs. outpatient) and by irAE Type**

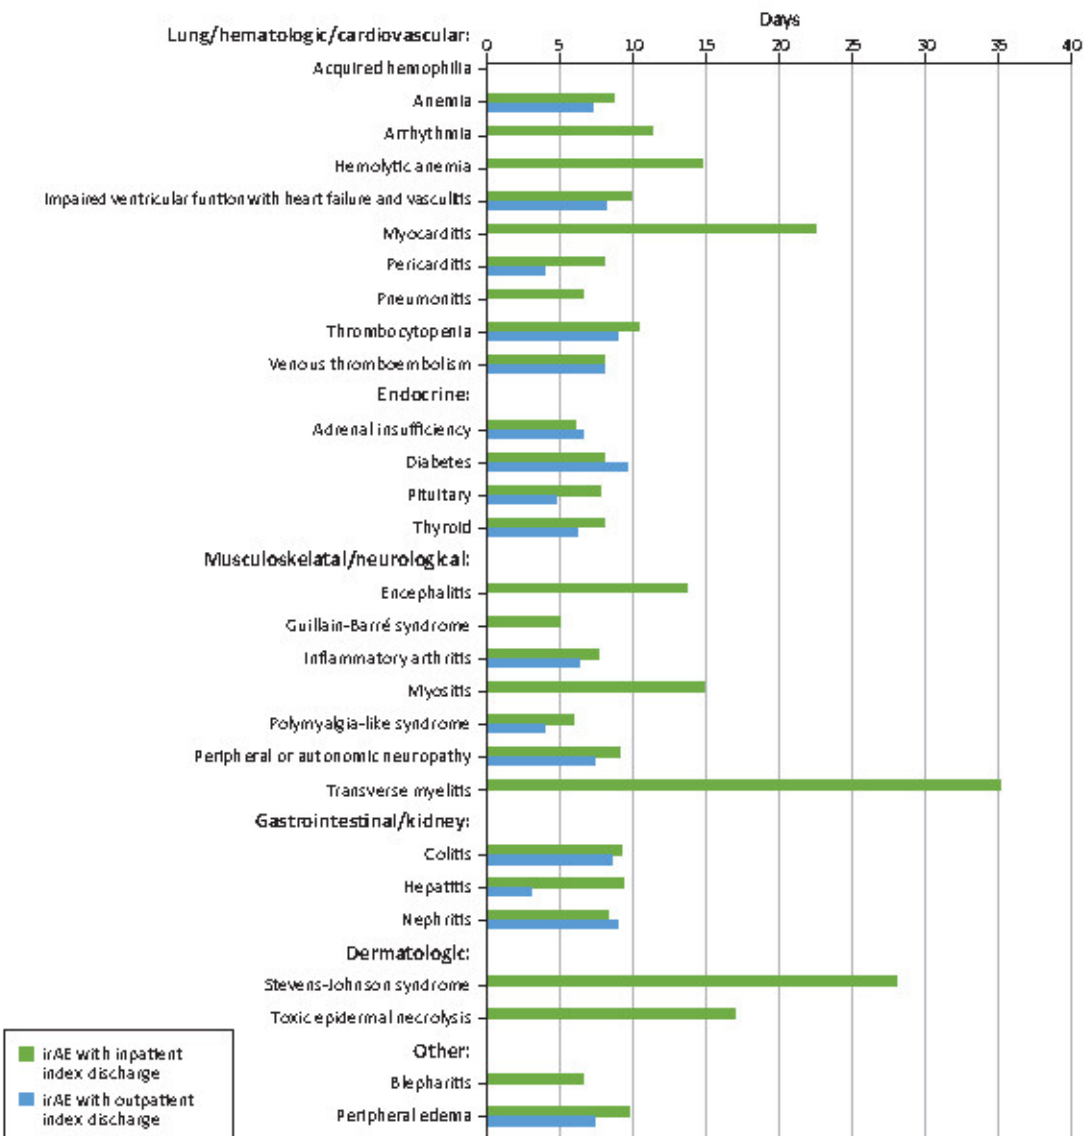

Supplement: ONCO-26-e2002-s001.pdf [file ONCO-26-e2002-s001.pdf]
